# Supplementary material for: Phylogenomic Analysis Reveals Dynamic Evolutionary History of the Drosophila Heterochromatin Protein 1 (HP1) Gene Family
Source: PLoS Genet. 2012 Jun 21;8(6):e1002729. doi: 10.1371/journal.pgen.1002729 (PMC3380853; doi:10.1371/journal.pgen.1002729)
Supplement: Figure S1 — Alignment of the HP1E syntenic region between D. melanogaster (“mel”) and D. pseudoobscura (“pse”). The D. melanogaster HP1E coding sequence is highlighted in yellow. D. pseudoobscura harbors pseudogenized remnants of HP1E flanked by conserved regions. (PDF) [file pgen.1002729.s001.pdf]

Figure S1.

|            |                                                                     |                                                                     |                                                                     |
|------------|---------------------------------------------------------------------|---------------------------------------------------------------------|---------------------------------------------------------------------|
| pse<br>mel | GGATTTCGACTGATTTATTCCGTTACGTACCGCTCACTGCACACATTTTGATTCGCCGATTG 926  | ACATAATTACAAAGGCAATTTGCTTGTGCCCTTTTTTAAAAAATTATTGTATTTTCCTAGCC 1798 | TTACGCAACATAATAAAGGAAAAATGCCAACTTTTAAAGTGATTTTCGAGGCGTGTTTGT 2698   |
|            | TAAGTCGCCTGATTTATTCCGGCCACGTAGCACTCACTGCACAGTTTGATTGCCACATTC 857    | ACG-----AAAATGTTTTTCGCTCTG-----ACATTGCTGTCAAACCTCATCA 1680          | TTACAAACAATAATGAAGG-CAAAATGCCAAGTTTTAAGTGATTTTGGGGCGTGTTTG- 2417    |
|            | . * ***,***** ***** *,***** ***** ,****                             | ** , **** * :*,* ***, **,*, **,*,* * *                              | *****,*.,*****.,*,* ,***** ***** ***** *,*****                      |
| pse<br>mel | GGATGTAAATCTCGGCCTCTAAAAAGAGACCCAACCATTCGGGCCAATCCGCCAAAATCT 986    | TAAATTTTCTCGTAAACAACATAGGGCTGCAACGATTTGGTTATCGGAATGGAAAAA 1858      | TCCGGGTGCCCCCGAGTAAACATTCCTAATTGCAACAACAACTCG---ACTATGGGGCA 2755    |
|            | GCATGTAAATGCTGGCCTCTAAAAAGTATTCAAACCAAGCGACCCAATCC-CACAAATCT 916    | AAAAAATACATTTGAACATTTAAAAATATAAAATGGATTCAAGTGGCG--ATGGTGGCG 1738    | CCCACAGGCAGCG--TAAACACTCTTAATTGCAACAACAGTGCCGGCAAACAAGGGCCA 2475    |
|            | * ***** *****:.,* ,*****: **, ***** *,.*****                        | :****:*,* .* **..:*,*.. .,.*:*,* ***,*.:*,* ** *:***:....           | ***, :* *,* ** ***** ** ***** ***** . ** *,*:*** **                 |
| pse<br>mel | GGCCACGTC AACACGCATAATCGGGCTTTTAATTTCTGGGCAATAAAACCTTGATGCCT 1046   | AAATCACTTTGTGCGCGTAACAGCCCAATCCAACAAAATAGTTGAAAAAGTTGACCGTG 1918    | G-----GCACCAAAACAGAAGAGGCTCGAGGAATTTACAGCACGGGAAAAATGAAGACAAA 2809  |
|            | GTCCACGTCATCGCGCATAATCGAGCTTTTAATTTCTGGGTAATAAACTTTG-----CC 971     | AGACCGTTT---CGAATTTCT-----CTGAAAATTCGACGGATTTTGAAGAAACTG 1786       | GGAATGTACGACGGCCAAAATGAAGCGAAAAATTTGCATTCCGTTTTTGTGGCCATTCC 2535    |
|            | * *****:*,***** ,***** ***** ***** *                                | *,* *,* ** **..:*,* ***,*:*,* *,*.:*,*.:*,*.,* **                   | * .*,*..*,*.,* ** .,*,*:***.,* ** :*:*,*.,* *,* .                   |
| pse<br>mel | TATTTAATGT CACAACGTGGAAAACTCTTCTCTCCAGGATT-----TGACAC 1095          | GAAAGTGTGTCAATGTCAAACCAAAGGAAGACGACAAAAATTGACAAGCCATAAAGGTA 1978    | ATATTTGCATTCTCTTTTTTTTTTGTTCCTCT--CTTTGGCCCCCGTGGTGGATGGGG 2866     |
|            | GATTTAATATCAGGTACGTGGCGCCTTCATTCTACAAAAGAAAGCCATAAAATGTGGAC 1031    | AGGAGTATATTGTAGAGAGGATTTTGGATCGAAGGCATTATATG---GGCCAAT---TA 1839    | CTTGTCTCATCGCAAGTACCAAAAGTCGTAAGACCTATTCTCTGTTTTTGGCTGATGGGG 2595   |
|            | *****.,*** .:*****. ....: *****. .*,*.:* *****                      | ..****.,*.* .:*,* *,*.. :*:*,*.,*.,*.,*.:*,*.:*,* ***,*: **         | *,*: * *** *:*: *: :*:.,* *,* ***,** * *** *****                    |
| pse<br>mel | AAAGTTTGATGAAGAGCATAAAAAATAGGTGTTTTTTCAAGTCTCAAAGAAAGAACTCC 1155    | CGATAAAAAGTCAAGAGAAAAATATCCAATGACTTTGCAACAAATTTATTCATTGGCCA 2038    | CGTG---CCTGGTCGGCCAGTGGCC---TATATTTGAGTCCGTTATTACAGCGTTTTGGTT 2920  |
|            | TGACTTCGAGGGAAGCCATAAACTTA--TGTTTTTCAATGAAGGATAAAATAGAAAAATA 1089   | CAATAC TTTGGTCAAATGGCTGGATTATAG-----CGATGAAGATAATACCTGGG---- 1888   | CGTGGTGCCGAGCTACTTTTGCCCTATATATTCGTGTTTTGTTTTCGTCACTTGGGTC 2655     |
|            | .,* ** ** *,*.. *****.:* ***** .*,*: :*,*: *****.: *                | *,****.:*:*****.:*.:* ***,*.* ***: **,*:*,*.:*,* *,*                | **** * ***,** .*: * *** ***** *,** ***,***,* ., * ** ***            |
| pse<br>mel | GAAAATATTTGTACTAATTAAGAATCTAT--TACTGAACAAACATACGATAAAATTGGT 1213    | ACACGATTGTAGTCCATAAATATTCATGGTAAATTGAACTATTGAATGTTTTGTGTACC 2098    | TGTTTGTGTG-CGTTACTCCCAACAGGCACGTAGTAGCACCAGCAGCCGCATAGGGAAT 2979    |
|            | ACTAGTTGTTACACCTTTCAAATTTTAAAGCATATTCCCAATTTATTGTCAAGTGATT 1149     | AATCGGCAGCAGATCTCG-----ATTCGCAATTCA 1917                            | CTTTTTTTTGGAGGGGGGGGGGGGGCTCTGCTGCTACCCAGTTGCGTCCAGTGGGCAC 2715     |
|            | ..:*,*: ***,* ** :*,* **.:*,* :*: :*:.,*.,* ***,* ***,*.,* *        | *,*:**.,* ***: *: . :***. :*,* *: ***,* ***,*.:*,*.:*,*.,* *        | *** ***,* . . ., .***:*,* . . *****:*,* *** :*,*.,*                 |
| pse<br>mel | GAAAATAATTTGTGCGGAATCCCATCCGTT-----AAACACAAC TTTTCATCATTA 1265      | CCAACTGCTGCATCTGAAATCATTAGAAGCATGGGAAAATCGGATGAAGCGAAGGCCCA 2158    | GCTTTGTTTTATG-CAGCAAGGAA-TTCCAATGCGAGTTCCTGCAGTTCACCAGAAATGGA 3037  |
|            | CATCAACGATTTCTGTGGCCTGCAAAGTTTGCTTGAAAGGCAAAAGATTTGTTCATTA 1209     | CTTATTGAT-----TCGATTGAATCACA AAAAGTCTGAAGAGG----- 1956              | GTAGCCACAATAGCAGCAAAAAGGTTTCGTTTAAGCCTTCTGCACTTTTGCGC----- 2768     |
|            | *,*:..*.:*,* *,* ., * **:., ** *,*.,* *,* :*** :*****               | *,*:*,*.,* ***,*:*** ** ..*,**.,* ***:*,*.,*                        | * : : :*,* *****.,*.* ** *,*:*,*.. * ***** ** .*,*.                 |
| pse<br>mel | AACATTATGATATTCAAGCCCCACCT-CAACAACTTTTCATCCACGAGTATCCCGAACT 1324    | TTCTAGTTCCTTATCGGAGATGAGACTTATCTTCAACACAGCATTAAAGAAACCAACCA 2218    | AAACTTTGATACTGCAGTTCTATATATAGAAAAATGTGTACTG-CAGTGGC-CATATAT 3095    |
|            | AACAACGTGATACAGAAACCAAAC TGAAAAAACTTTGTCTACGAGTATTTTCAA 1268        | -----GGTCAAGAGCTGAATATCAATATGAAACTAAAG-----CTA 1993                 | -AGAATTGATACTGCAATATCCGGTCGAGCAAGTTCAACTCCAATCAATTGCTCTTCGAT 2827   |
|            | ****: ,***** :*,*.,*.,*.,*.,* .**.,***** **: ***** * *****          | ***: *,*:***. :*,*:*** * ..*,* ***** *:*                            | *,*.:*****,*.: . .*,* ***,*.:* .:*,*.,* ***,* ** *,*:*,* **         |
| pse<br>mel | TTTGCAAAGTTTACGCATAATTTTTTAACGATATTTCCCGCATTTAGCCTTCGAGTGG- 1383    | AACGTACGATTGAAAGTTGATCCCGCTGTAGTAATTGATTATCCTTTTCAGTCGTGGTTT 2278   | GTAGAAAAGTGTTT--AGCTTACAATATATAGAAGCCCGCTTTCAATTAGTCAGACGTC 3152    |
|            | TTTCGCCAAGTTTACGCATAATTTTTTACGATATTTCCCGAGTTTTCCTTTTGACGGC 1328     | AACG----ACTGAAAAATCGATCCATGCTAGTAGTAGATAGTCCCTTTAATCATGGTTT 2049    | ATTGGTAAGTTTTTGTGCGCGGTAAAGAAACTAAGACCTATTGAAATTTATAGGCACAC 2887    |
|            | *** ***,***** *****:***** ***,*:*** ***,* ., **                     | **** * *****.* ***** * *****.,*:***** *,*.,*****                    | *,*:*:*** ***,* ** *:*,*.:*.,* ***,* ***,* ***,*:*,*.. :*           |
| pse<br>mel | -----TGTTGCTGGTGTGTCTTCGAGCACTTTTGTTGGCCTCCACGGATTCCAAATAC 1438     | AAAGCTGAACAGATGCTCGAAGGTTTCAAAAAGGGAGAACAAATATCGCTTCTGATCAGG 2338   | TGATCTTTTGTGACTTGATTTTTGTAGATTATAAGGGTATGATAATATATGTATGTCACA 3212   |
|            | TCATCTTATTCTTATTGTGTGTCGAAAGGACTTACCCAG-CATCCAGGGATCTCTAATAG 1387   | ACTGCACAAGAGATTCTAAAAGGCGCTAAAAACAATGGTGAAATATCGTTTTTAATTAG 2109    | GCTTGATTG--AACTTTTGTTTTGACGTTATGCTTGCACTGGTGTTCAAT-ACATTCTCT 2944   |
|            | * ., ** *,* ***** .,*,* *****: *,* *,***** ***** *,*****            | *,*:***: ** ***** ***,***** ***** ..*,*: ***** ** *,* ** **         | :* :** .*** : *****.:*,*: :* *:*,*.,*.:*,* :*,* *:*                 |
| pse<br>mel | GTTTCGGGCCAAACAACCTTTATTCAATTTCTCATATTGCATTGGCATTGGTATTTTATTA 1498  | TCTATGCTGTATCTAGGCTTCGCCTATGTGAAAATACCCACACGGTCTTCAAGTTCTA 2398     | GGCAAAAGAAAACATACATTGTACTC-----TTGATTCCAGATTCCCTGATCAGCATCAG- 3266  |
|            | ATTTCCGG-CAAACAATTTTATTCACTTTCTGCTATTGAATT----TGATATTAT-TAA 1440    | -----TTTTGGCATC-----TCGATCAACCACAAGTGGTG-----C 2140                 | ATTCAAAATATTCTTAGATTAAGCTAGATAACTGATCCATGAAACTAGTGAAGCATTTAT 3004   |
|            | .,***** ***** *****.,***** .*****.,*** *****:*,*:*                  | * *:***: ** *:***: ** *:*,*:*** ***,*.:*,*: ***** ** *,* ** *       | . .***.:*:*:** ***,*.,**., ***** *,*:*,*:*,* :*: .***** :.          |
| pse<br>mel | AGCTGTTATGCTCTGAGCTCCTGGATATTAAGATAAGACAACCTCCTGGTAAAGTTTCTT 1558   | CGAAAAGAAATTGCCAATTGCAAAACTTAATAAGGATTGAATGAAAAACAAGACATTGTG 2458   | CCACCCTATTTCAGTCGTAACATCAGCCATAGCACCCCTTACTCCGTTTCTTTTTAAGGGTA 3326 |
|            | TGCCGCAATTC-CTAAGCTGTGGGCATTAAGTATATGGCTAACTTTT-----CTACT 1491      | CAAGTGGAAATTGCATATGTGGAAATACCGCAGATGGTT--CTGAAATTCTATGAAATCA 2198   | TCACGCTGTGCTTTTTTAGATTTTGTGAGTTAAAAAAGAATAATGTTTTTTTTTCGATTTT 3064  |
|            | :** *,* :*,* *,*.,**** **.:*:*,* *****:*,*.,* *,* *,* *             | *,*.:*,*.:*****.:** ** ***,* ., ..*,* **,*,* *****:*,* .*,*: .      | *** ***,* *: * **..:*,* :*,* *: .,*: :*,*.. ** *****.. *:           |
| pse<br>mel | CCTGAATATTAATAAATTTTCGAGTGTTTAGTATTAATAATTTTATGGTAATCTCCGGCAA 1618  | TTGGACGTTTTTGGGCATTTTTTTCGTCAAAATTGCCCTTAAGATTCTTAGCAGATAAAATA 2518 | ATCAAGCGTCGCTTTTCATGAACAAAACAG-AAAAAAAAAATTAATTGCGTGCCCAGGCGT 3385  |
|            | TCAGGATATTAACGAATTCATTACAATATTTTTCATAATTTTAT----- 1536              | TTG--CAATTTTTCACGATTATTTAAATAATTAT--ATATCATGACTTGCAATTTCTGGAT 2253  | CACAGAAATAATTGAAAAAAGGAGGGGGGGAACAAAAAATTAATTGGCGCCTA--CAT 3122     |
|            | *,*.,***** .**** . :. .:*:*,* *,*.,*****                            | *** *,*.:*** .,.*.:***.: :*:*** :*: ** . *:***:*,*.:* **            | :**.....* * :*,*.,**.,* . * ***,***** ***** * ***,* **,             |
| pse<br>mel | ACGATTGATATTTCTTTGGCAACAAAAATTTGGATGGTTTTTATTTTCGCAAAAAATTAA 1678   | CACCAAAATCCTAATATGTATTATATTAATTTTATTCTTATTCCATTAAACTGTTGTACT 2578   | TGGCTTTTCTCCTTTCCCATCTCGCCACATGCCATTATTTTTTGTTTTCCATGAGGTCA 3445    |
|            | -----TTCTTTTGGCAAGAAGATATTAAG-----TAGACCAGCATTTAAAGA 1580           | CTTCAAAAAAAAAAAACTTATGAATATGTGTGTGAGCTTCTTATATT-----TTATATG 2307    | T--CTATTGCCACATTCCAACCT-----ATCCACTTCTTTGTTTCGCATGAGGTCA 3174       |
|            | ** ***** ***,*.,*.:*,*..* ** : .***:~::~*,*~::~*                    | *,* *****:..:~::~*:~::~*:~::~* *,*.: ***** ***,* ***,* **           | * ***,** *,* .: *,*~::~*~::~* : *** *,* ***** *****                 |
| pse<br>mel | AATATTGCTCCCGTAAAATAGATGACTTATTGATGCAGTAGCAATGGTATAAATTACAATT 1738  | GCAGTTCCAATTTGTTGTTTCTTTTATTTTACACATATTTGCACCATTAAATTGTGCCACT 2638  | AGGGTTAAGTACATACACATGCAGTATTTGTTTACGTGCTTGAGCCGAACCTCAAACA 3505     |
|            | AAACTTG--TCTGCACAGAAAAC TACGTTTTGTTG-AGTAGCAACTGTAGATAAAAAAGTT 1637 | TTAGGTTAAATTGCTTTACTTTTTTATAATAAAG--GTGTCCCTT----TGACAGCA 2359      | AGGGTTAAATGTACACACGCATACA----TACATACATGCATGATGACCGTATTTGTTT 3229    |
|            | ***:*** ***,*.,*.,*.,*.,* ***,*~::~*~::~* ** *,*~::~* ** *,*~::~*   | ** * *,*~::~* *,* : *****:~::~*.,*.. ** *,*~::~* ** *,*~::~*        | *****.,* * *****.,** *,*~::~*~::~*~::~* . . .*~::~*~::~*            |
|            |                                                                     |                                                                     | ATGAACGACCCACACCCATTGTTCCAAGATGTAGAGTATGCTCTATGAATAGCAGAGTTT 3565   |
