# Supplementary material for: Phylogenomic Analysis Reveals Dynamic Evolutionary History of the Drosophila Heterochromatin Protein 1 (HP1) Gene Family
Source: PubMed Central journal article supplement (PMC3380853; doi:10.1371/journal.pgen.1002729), 2012-06-21
Supplement: pgen.1002729.s002.pdf [file pgen.1002729.s002.pdf]

Figure S2.

```
sim      CCTTTCCAACGTCGGTTTGTTCAAAGTTCGCTTTTCGACTGACCAGACTCGGCTTTCGG 60
mel      -----GTCCGTTTGTTCAAAGTTCGCTTTTCAACTGACCAGATTCGGCTTTCGG 50
          *****
sim      TTGCGCGGCCAAAAATGCCAAATGCCCGCAGCTGTGACCATCCGCCAGTGAGGCGTAA 120
mel      TTGCGCGGCCAAAAATGCCAAATGCCCGCAGTGTGACCATCCGTCAGTCAGCGTGA 110
          *****
sim      ATACCAAAAAGCTCACGCGGGATG-TTCGGTTACTACAACAAAAGCTTTTGGTAAA 179
mel      ATACCGAAAAGCTCACGCGTGTGCTCCGGTTACTACAACAAAAGCTTTTGGTAAA 170
          *****
sim      ATCGAGGCT---AACGGCTTTTAAAACGCAATCTTCATTTAATATGTTAAGCATTAT 236
mel      ATCGAAGCTTACAACAGCTTTTAAAACGCAATGAACAAAATATTACAGAGTATT--- 226
          *****
sim      GAAAAATAAATAATTGTGCGATTACAATGCAACCTTGGCAACCAGACTATATTGAAATG 296
mel      -----TACACGACGAGCTT-----TTT'TTTCAATTG 253
          *****
sim      GACTTGGGCAAAACATTATGTTGTGGGGAGGGGGAGGGGAGGAGCAGAAACAGCAGAG 356
mel      -----TCAACTAATTG-----AAAAAAGCTCGT- 277
          *****
sim      CGTCCGTTTGA AAAAAGAACATCAAAATTCGCAGAAAGGAAAGAAATAAAAATAAGAA 416
mel      -----TGTGTAAT-ATTTTGTGACAACCTCTGTG----- 305
          *****
sim      AAGACTTCTTCTTCAAAATATTCAGCTATATTTAAATTTACCTTTACTGGCTAAAATA 476
mel      -----TATATATACATATGTACATATTTAATAT---GTTACACATTTTTG---AA 350
          *****
sim      ATTTTCATTAATATCTAGTGAAATCTTATTTAAAGATGCGCATGATCTTACCAATTAGTT 536
mel      AAATAAATAATTG-----GCGCAATACAGGGCCACTTTGGT 386
          *****
sim      TTTTATGCGGAAAAAGC GAAAAGAAAGT TAAAAGT TTTAAAATAAAAATCATGATTCAC 596
mel      TTACAT----- 392
          **
sim      TCCATTCCAAAAAACAACTTTTGTGAAAATGCCTAATTTTGGAAATAGTAGTGAAC 656
mel      -----
sim      AAGCAGCTGCGCCACATCTTTTCGTGTTGGCAACGTCATTACGGTCGAGGAGTTTCCTC 716
mel      -AGCACAGGCAAAACAT-----GTTG----- 412
          *****
sim      ATTTCTTTTGATTCGGCAACGAAAATATAAGTAAAATGCGCAACCCACAGCGGAGAAAC 776
mel      -----CTTCGGAGATTCTAA-----TAC 430
          *****
sim      ACGGTGGACAGCCAGAAGTATGTGGTGGAGAAAGATCGTTGGAAAGCGCATCGTAAAAGGT 836
mel      ACG-----ATATAACGT----- 443
          ***
sim      CGTCTGCAGTTTCGTGTCAAGTGGATGCACTATCCGATGAAAAGCGAGCACATGGGAGCCA 896
mel      -----ATGAAAACAAGCA----- 456
          *****

sim      GTGGAAGCATTTGGGCCACCTCTCGCGCTTGCTGGCCGATTATGAGGCGAGGCAGTACAAG 956
mel      -----TGAACGAATATAAAGT----- 472
          **..***:***.*
sim      CGCTTCGGGAAGAAGCTGGCCAAGGCGGCAAAGGGCCCAAAATCGCGAGCCAAAAGCAAAG 1016
mel      CCCTTCGG-----CTTTCGAAGCCTGCTGG----- 497
          * **** * ** ***** * **:..
sim      GCTAAGAGCGCCGCCCTCGACGCCAATCGCGCCACGTGCCAGTGCCCAAGCAGCAACA 1076
mel      -----AT 499
          .:
sim      TCGGCTACATCGGGCTCGGCCGAGCGGGCCAAAGGAGCAAATGGGGAACCGGGCAGTAAT 1136
mel      TTATCTTCATCGG---AGGTTTCATCTG---AGGTG-ATATGG---ACGAAGATGGAAT 548
          * . **:***** .** ** * ** ** *:*** ** **..*:* **
sim      GAGCAATCATCAGGGAGTTCGGTGGTAGCTCGAGGAGTTGGTCTCGCGCATGAGCGCAAAG 1196
mel      GA-----CGAG-----G 555
          ** **** *
sim      CGTGTGCATCCGCTGGCTGTGGAGCAGCCAAGGATCGAGGGCGTGCAGCATCCACGCACT 1256
mel      CATT'TTTTCCGAT----- 569
          *. * :****.*
sim      TCACGCGGCACATCCGCGCAGGTACCGAACTGGAAAATGGAGCCGTACAGGGGGTCTCTTC 1316
mel      -----TTACACGCAG----- 579
          :*.*****
sim      GGT'TTGGCGCTGGCCTGGAGCTGGAAAAGGTGCACCCTGCTTCTTTTTCGCAGGCAG 1376
mel      -----AAGCAG 585
          *.****
sim      CTCTTCATGTTTCGTACCTGGGTGGGACACCCACGATGGACGCGGTGCTGCTTAGCGAC 1436
mel      CAG----- 589
          *: *
sim      ATACGACACGCATATCCGATGCCAATAAATTAATACTTTCAAATTTGGCCTTCCCAAAT 1496
mel      -----
sim      TACAAAGATGCCTGAATTCAAGGGAATCGCATTTCAAACATAGATTAAGCGTTTTTTTTT 1556
mel      -----AGCGTCTTTT- 601
          *****
sim      TAACCTCATCTAGATAGCATAGCATTTAACATGTTTGTACGCAGCTCGATCGTCACTAT 1616
mel      -----ATAGCATTTAATATGATTGTACACAGTTCGATCGTCACTAT 643
          *****
sim      GCGATTGTTAATCACTAGTCAAGCTTTCCACGACATGTGACCAGATTTTCAGTCGCCTTT 1676
mel      GCGATTGTTAATCATATTTAAGCTTTTCAAGACATGTGACCAGATTTTAGTCGCCTTT 703
          *****
sim      CCAGCCGAGCTTCCGAAAATCTGATACCTTATACTATGGCGCCATTCGCGCAGCCT--CA 1734
mel      CAAGCTGAGATTCGAAAATCAGATACTTTATACTATGGCGCCATTCGCGCAGCCTCACA 763
          *.** **..*****:*****
sim      CTGATTGTAACAAGTAAGCGGATACGCTGTAGCCAAATCATAAACACCAGCGATCAAT 1794
mel      CTGATTGAAAACAAGTAAGCTGATAG-CTGG-----ATACGCTGCAAGGCAAAAGT 812
          *****:***** ** ** **..*:* *.*.*.*.*
```
