# Supplementary material for: Phylogenomic Analysis Reveals Dynamic Evolutionary History of the Drosophila Heterochromatin Protein 1 (HP1) Gene Family
Source: PubMed Central journal article supplement (PMC3380853; doi:10.1371/journal.pgen.1002729), 2012-06-21
Supplement: pgen.1002729.s003.pdf [file pgen.1002729.s003.pdf]

|                  |                                                               |      |                  |                                                                 |      |
|------------------|---------------------------------------------------------------|------|------------------|-----------------------------------------------------------------|------|
| D. pseudoobscura | AAAGTGTGT-----CAATGTCAAACCAAAGGAAGACGACAAAAATTGA              | 909  | D. pseudoobscura | CTCGAAGGTTTCA-AAAAGGGGAGAACAATAATCGCTTCTGATCAG-----GTCTATG      | 1290 |
| D. persimilis    | AAAGTGTAT-----CAATGTCAAACCAAAGGAAGACGACAAAAATTGA              | 883  | D. persimilis    | CTCGAAGGTTTCA-AAAAGGGGAGAACAATAATCGATTTTGTATCAG-----GTCTATG     | 1264 |
| D. affinis       | AAAGTGTGG-----CAATGTCAAAGCCAAAAGAAAGACGGCAAAAATTGA            | 875  | D. affinis       | CTCGAAGGTTTCA-AAAAGGGGAGAAAATCAGATTTCTGAGCAATTTTTATCATCTGCA     | 1193 |
| D. azteca        | AAAGTGTGT-----CAATGTCAAACCAAAGAAAGACG-CAAAAGTTAA              | 736  | D. azteca        | CTCAAAGGTGTCACAAAAGGGGAGAAAAGTACAGTTTCTGATCAA-----GCA           | 1008 |
| D. bifasciata    | TAAGGGCCA-----TACAAGTTC--CTCATTGGAGATGCTG--AGCTTAG-           | 903  | D. bifasciata    | CTCGAAGGTTTCA-AAAAGGGGCAACAATAATCGTTTCTGATCAAGTTTGTAGTCTGGT     | 1249 |
| D. guanche       | TAAGGATCAACTGGTGGACCAACC GCAACTTCTGCGCATTAAAATCACTACAAACATGGA | 924  | D. guanche       | CTCAACAGTTTCA-AAAACGGGAGAAGAAAATATCGTTTCTAATAAAGTTTCTGTAATCTGGA | 1443 |
|                  | ***                                                           |      |                  | *** * * * * * * * * * * * * * * * * *                           |      |
| D. pseudoobscura | CAAGCCA-----TAAAGGTACGA-TAAAAAGTCAAGAGAAAATA                  | 947  | D. pseudoobscura | TCTGTATCTAG-GCTTCG-----CCTATGTGGAATACCCACACGGTCTTCAA            | 1338 |
| D. persimilis    | CAAGCCA-----TAAAGGTACGA-TAAAAAGTCAAGAGAAAATA                  | 921  | D. persimilis    | TCTGTATCTAG-GCCACA-----CCTATGTGGA---ACCCACACGATCTTCAA           | 1309 |
| D. affinis       | CGAGCCA-----GAAAGTTACGA-TAAAAATTCAAG--AAAGCA                  | 911  | D. affinis       | GCTGCCGCAAGAGGATCAATTCGGCATAGCCCATGTGGAATACCCCAAAATGGTCTTTAA    | 1253 |
| D. azteca        | --AATAA-----AAAAGTCAA-----AAG--AAAGCA                         | 759  | D. azteca        | TCTGCCGCAAAATGTTTCAAT-----CCAAAACGTCTTTAA                       | 1043 |
| D. bifasciata    | ---CCA-----CAGATGGTATCGACTTTGTTCCCTGAG--AAAATA                | 938  | D. bifasciata    | GCTGCCGCAAAATGGTACCCTGCTGACGTGGCCTATGTGGAATACCTCANATGGTCTTTGA   | 1309 |
| D. guanche       | AGAACCAATAAACTAAGAGCGAAGCAGATAGCCCGAATATATTGTTGAG--AAAATA     | 982  | D. guanche       | GCTGCCGCTAATGATCAAGTCTACGTGGCCTATGTGGAATACCCGACATGGTCTTTAA      | 1503 |
|                  | * * * * *                                                     |      |                  | *** * * * * * * * * * * * * * * * *                             |      |
| D. pseudoobscura | TT---CCAATGACTTTCGAACAAATTTATCCAT---TGGCCAACACGATT-GTA-----   | 995  | D. pseudoobscura | GTTCTACGAAAAGAATTGCCAATTTGCAAACTTAATAAGGA-----TT                | 1382 |
| D. persimilis    | TT---CCAATGACTTTCGAACAAATTTATCCAT---TGGCCAACACGATT-GTA-----   | 969  | D. persimilis    | GTTCTACGAAAAGAATTGCCAATTTGCAAACTTAATAAGGA-----TT                | 1353 |
| D. affinis       | AT---TCAAGGGCCCTCGA---AATTCACAACAT---TGGCC--TTTGATTGTACT---   | 957  | D. affinis       | GTTCTATGAAAACCGTTAAAAGTTTATAAATCTACACGAGGA-----TT               | 1297 |
| D. azteca        | AT---TCAAAGCCTCTCGA---AATTCACAACAT---TGGCC--TTTGATTGCATT---   | 805  | D. azteca        | GTTCTATGAAAACCGTTGCAATTTATAAATCTACCAAGA-----TT                  | 1087 |
| D. bifasciata    | ATCGGTGAGCGAAAACATAAGGGCAATGTGCAATATCTGGTCA-AGTGGTT-GTACTACC  | 996  | D. bifasciata    | ATTCTACGAAAAGAATTGCCACTTTATTAACCTCAATTAGCATTAAATGAAGAATGAATT    | 1369 |
| D. guanche       | GTCGGTCAAGAGAACTCAGAAGGGATGCGTCAATATTTTGTCA-AATGGTT-GAATTACC  | 1040 | D. guanche       | GCACTACGAAAAGACATGCACATTTGTAACACCTAAATAGCA-----ATC              | 1548 |
|                  | * * * * *                                                     |      |                  | *** * * * * * * * * * * * * * * * *                             |      |
| D. pseudoobscura | -----GTCCATA-----AATATTCATGGTAAATPGAA---CTATTGAATGTTTTGTT     | 1039 | D. pseudoobscura | GAATGAAAACAAGACATTTGTTGGACGTT-----TTGGGCACTT                    | 1423 |
| D. persimilis    | -----GTCCATA-----AATATTCATGGTAAATPGAA---CTATTGAATGTTTTGTT     | 1013 | D. persimilis    | GAATAAAGAATA-----GTTA-----T-----TTAAA---TT                      | 1377 |
| D. affinis       | -CGCAGAGGACAGTA-----AATATTCATGGTAAATPGAA---CTATTGAATTCGTTGTT  | 1008 | D. affinis       | GAATAAAGAA-----                                                 | 1307 |
| D. azteca        | -TGCAGAGGTGAGTA-----AAAATTCATG-TAAGTTGAA---CTATTGAATGCGTTATT  | 855  | D. azteca        | GAATGAAGAA-----                                                 | 1097 |
| D. bifasciata    | CCGATGAGGATAAATACGTGGGAACCTCCAGCAGCCTGGATGGCTGT-GAACATCTGATT  | 1055 | D. bifasciata    | GAATGAAGAAGGTAATCAAAAAGTATTTAAT-AATTTGTATACACAATTGTCTAATTGTT    | 1428 |
| D. guanche       | CAGAAGCGGATAAATACTTGGGAACCTCCAGCGACCTGAA---CTAT-GACCATCTGATC  | 1096 | D. guanche       | TA-TGAAGAAGGTAATATACAGGTTTTTTTTTAAATTTATCCAAACTAATGTCTAAAAATT   | 1607 |
|                  | * * * * *                                                     |      |                  | * * * * *                                                       |      |
| D. pseudoobscura | GTACCCCAACTGCTGCATCTGGAAATCATTAGAAGCATGGGAAAATCGGATGAAG-----  | 1094 | D. pseudoobscura | TTTTCGTCAA-----AATTGCCT-----TAAGATTCTTAGCAGATA                  | 1459 |
| D. persimilis    | GTACCCCAACTGCTGCATCTGGAAATCATTAGAAGCATGGGAAAATCGGATGAAG-----  | 1068 | D. persimilis    | TGTTCCCTCAA-----AATTGCCT-----TAAGATTCTGAACAGATA                 | 1413 |
| D. affinis       | TT-----CATTTG-----TT-----                                     | 1018 | D. affinis       | -----GT-----AG-----                                             | 1311 |
| D. azteca        | TT-----CATTTT-----TT-----                                     | 865  | D. azteca        | -----GA-----AGCAGCTG-----CAAC-----GTG                           | 1114 |
| D. bifasciata    | GCCGCCTAT-----CATCTGCAACA-----CGA-----                        | 1078 | D. bifasciata    | TTGCAATTATTTAACAGCTCAATCGTTTGGTTACTACACAAATCAGCTGCTGTCAACGCA    | 1488 |
| D. guanche       | GCCGCTTAT-----CATACTCAACAGAGTGTGAAGCGTCCATTCACTGTTGAGAAAATA   | 1150 | D. guanche       | TCCTTATTATTTAACAGATCAATCGCTTGGCCACAACCCAAATAATCTGC-GGCAAAGCA    | 1666 |
|                  | ***                                                           |      |                  | *                                                               |      |
| D. pseudoobscura | -----CGAAGGCCCATCTAGTTCCTTATCGGAGATGAGACTT-----               | 1132 | D. pseudoobscura | ---AATAACACCAAATCCTAATATGTATTATATTA--ATTTTTAT-TCTTATCCATTAA     | 1513 |
| D. persimilis    | -----CGAAGGCCCATCTAGTTCCTTATCGGAGATGAGGCTT-----               | 1106 | D. persimilis    | ---AATAAGACCAAATCCGAATATGTATTATATTA--ATTTTTAT-TCTTATCCATGAA     | 1467 |
| D. affinis       | -----CAAA-----TTC--GTACCATACCCAG---CGGCT---                   | 1044 | D. affinis       | -----GCCAAAACCTAAT---CTTATATTC--ATATTGCTGCTGCTTTTCATAAA         | 1356 |
| D. azteca        | -----CAAGG-----TTC--G-----                                    | 874  | D. azteca        | ---AATAAGGCCAAAACCAAT---CTTATATTC--ATTTGCTGCTGCTTCCATGAA        | 1165 |
| D. bifasciata    | -----CATTGATAA-----                                           | 1087 | D. bifasciata    | ---AATAAGGCCTACATCTAAT---ATTATATTATAATTTAAG--CTTCTCCATAAA       | 1539 |
| D. guanche       | ATCGGCCATAGAATCTCATGGGTAATGTGCAATATCTGTCAAGTGGTTGAATGTCTCC    | 1210 | D. guanche       | CTGAACAATTCCTAAATCGAAT---ATTATTTTT--ATTTGAAG--TTCTTT---AA       | 1713 |
|                  | *                                                             |      |                  | * * * * * * * * * * * * * * * *                                 |      |
| D. pseudoobscura | -----                                                         |      | D. pseudoobscura | ACTGTTGTACTGCAG-TTCCATTTGTTGTTTCTTTTATTTTACACATATTTGCACCATTA    | 1572 |
| D. persimilis    | -----                                                         |      | D. persimilis    | ACTGTTGTACTTTCAG-TTCCATTTGTTGTTTCTTTTATTTGTACACATATTTGCACCATTA  | 1526 |
| D. affinis       | -----                                                         |      | D. affinis       | G--GATCTACAACAT-CGCCATAT-TTG-----GCATATTTGCATCATTAA             | 1397 |
| D. azteca        | -----                                                         |      | D. azteca        | G--GATCTGCAACAT-CGCCAT--TTG-----TTTTTGCACCATTA                  | 1201 |
| D. bifasciata    | -----                                                         |      | D. bifasciata    | A--GATATTCAAGATATTCATTTGTTTTTTGTCC-----TTTATTTGCACCATTA         | 1588 |
| D. guanche       | GAAGAGGGTAGTACTTGGGAACAACCCAGTAGCCTGGTCTGTGACCATTGTGATCGCCGCC | 1270 | D. guanche       | A--GATGTTCAACGT-TTGCATTTGATTTCTA-----TTGCA---TTA                | 1750 |
|                  |                                                               |      |                  | * * * * * * * * * * * * * * * *                                 |      |
| D. pseudoobscura | -----ATCTTCAACACAGC-ATTAAGAAACCAACCAAACGTTACGATTGAAA          | 1179 | D. pseudoobscura | AATTGTGCCACTTTACGCAACATAATAAAGGAAAA-A--TGCCAA--CTTTTAAAGTGAT    | 1627 |
| D. persimilis    | -----ATCTTCAACACAGC-ATTAAGAAACCAACCAAACGTTACGATTGAAA          | 1153 | D. persimilis    | AATTGTGCCACTTTACGCAACATAATAAAGGAAAA-A--TGCCAA--CTTTTAAAGTGAT    | 1581 |
| D. affinis       | -----GCCTCTACAAATTAATTAGAAACATGGAC--AAATCTGCAAT---A           | 1085 | D. affinis       | AATTGTGCCACTTTACGCAAGATAATAGATGGAAAA-AAATGCCAACATTTTAAAGTGAT    | 1456 |
| D. azteca        | -----GCATCTACAAATTTATTAGAAACATAGAA--AAATCTGCAAT---A           | 915  | D. azteca        | AATTGTGCCACTTTACGCAAGATAATAAAGGAAAA-AAATGCCAA-ATTTTAAAGTGAT     | 1259 |
| D. bifasciata    | -----AGAATGAAACGAATT--GTACGAGTCAAGGCAAAA-----CGATTGAAA        | 1130 | D. bifasciata    | AATTGTGCCACTTTACGCAA--AATAGAAGGAAAAGAAAGTCCNA--CTTTTAAAGTGAT    | 1643 |
| D. guanche       | TATAATCTTCAAGACCTAAACGATGT--GTACGAAAAGAAAGCAAAA-----CGATTGAAA | 1324 | D. guanche       | AATTGTGCCACTTTGCGTAAACATAATAGAAGGAAAT-AAATGGCAA--CTTTTAAAGTGAT  | 1807 |
|                  | * * * * *                                                     |      |                  | ***** * * * * * * * * * * * * * * *                             |      |
| D. pseudoobscura | GTTGATCCCGCTGTAGTAATTTGATTATCCTTTCAGTCTGGTTCAAAGCTGAACAGATG   | 1239 | D. pseudoobscura | TTTCGAGGCGTGTGTTGTTCCGGGTGCCCC--GAGTAAACATTCCTAATTGCAACAACAA    | 1685 |
| D. persimilis    | GTTGATCACACTGTAGTCAATTTGATAATCCTTTCAGTCTGGTTCAAAGCTGAACAGATG  | 1213 | D. persimilis    | TTTCGAGGCGTGTGTTGTTCCGGGTGCCCC--GAGTAAACATTCCTAATTGCAACAACAA    | 1639 |
| D. affinis       | GTCAAATCTGC-----ATAACCCTTTCAGTCTGGTTCAAAGCTGAACAGATA          | 1134 | D. affinis       | TTTCGAGGCGTGTGTTGTTCCGGATGCCCC--GTGTAACATGCCTAATTGCAACAACAA     | 1515 |
| D. azteca        | GTC---TTG-----ATAACCCTTTCAGTCTGGTTCAAAGCTGAACAGATA            | 960  | D. azteca        | TTTCGAGGCGTGTGTTGTTCCGGATGCCCCCGGTGTAACATGCCTAATTGCAACAACAA     | 1319 |
| D. bifasciata    | GTCGATCCCACTGCAGTCAATGACAATCCCTTTAATCGTGGCTTCGAGGCTGAAAAGATA  | 1190 | D. bifasciata    | TTTCGAGGCGTGTGTTGTTCCGAGTGCCCC--GTGTAACATTCCTAATTGCAACAACAA     | 1701 |
| D. guanche       | GTTGACCCACGCCAGTCAATTTGATAATCCTTTTGTGCTGGCTTTGAGGCTGAAAATA    | 1384 | D. guanche       | TTTCAGGCGTGTGTTGTTCCGGGTGCCCC--GTGTAACATTCCTAATTGCAACAACAA      | 1864 |
|                  | ** * * * *                                                    |      |                  | **** * * * * * * * * * * * * * * *                              |      |
