# Supplementary material for: Phylogenomic Analysis Reveals Dynamic Evolutionary History of the Drosophila Heterochromatin Protein 1 (HP1) Gene Family
Source: PubMed Central journal article supplement (PMC3380853; doi:10.1371/journal.pgen.1002729), 2012-06-21
Supplement: pgen.1002729.s004.pdf [file pgen.1002729.s004.pdf]

Figure S4.

annotated as stop  
↓

Dgri.HPIJ MAEEYHVERIEGKRIKNGVTEYFLKWKGYPRNQNTWEPIKHLSCPD-IAAFEKSEKIKAH 59  
Dvir.HPIJ -MTDYVVEGIEGKRIVNGVTEYLLKWHGYPRSENTWEPVENLSCPDIAAFEESERNKAQ 59  
:\* \*\* \*\*\*\*\* \*\*\*\*\*:\*\*\*:\*\*\*\*.:\*\*\*\*\*:\*\*\*:\*\*\*\* \*\*\*\*\*:\*\*\*: \*\*:

Dgri.HPIJ AKKYKASGIDNTR-----VSQVERNFGFDRGLIPAQILGASHFSGELMFLMSWKN 109  
Dvir.HPIJ AKKRPSSEYSNTRDEQNKKITFIKDETEEKFGFERGLVASKILGATDSSGKLMFLMSWEN 119  
\*\*\* :\* .\*\*\* .:.\*.:.\*\*\*:\*\*\*:..:\*\*\*\*:. \*\*:\*\*\*\*\*\*:\*

Dgri.HPIJ>NNLIGLVPANLANIKCPQVVIEFYEARLIWND-----EIDKTT-- 147  
Dvir.HPIJ SDRYELVPAKLANVKCPHVVIKFYEERLTWESDKKNENNAKRERSAKNDNKVEIDLTVGE 179  
. : \*\*\*\*\*:\*\*\*:\*\*\*:\*\*\*:\*\*\*:\*\*\* \*\* \*:. \*\*\*\*\* \*

Dgri.HPIJ ----  
Dvir.HPIJ DVNF 183
