# Supplementary material for: Phylogenomic Analysis Reveals Dynamic Evolutionary History of the Drosophila Heterochromatin Protein 1 (HP1) Gene Family
Source: PubMed Central journal article supplement (PMC3380853; doi:10.1371/journal.pgen.1002729), 2012-06-21

Figure S6b

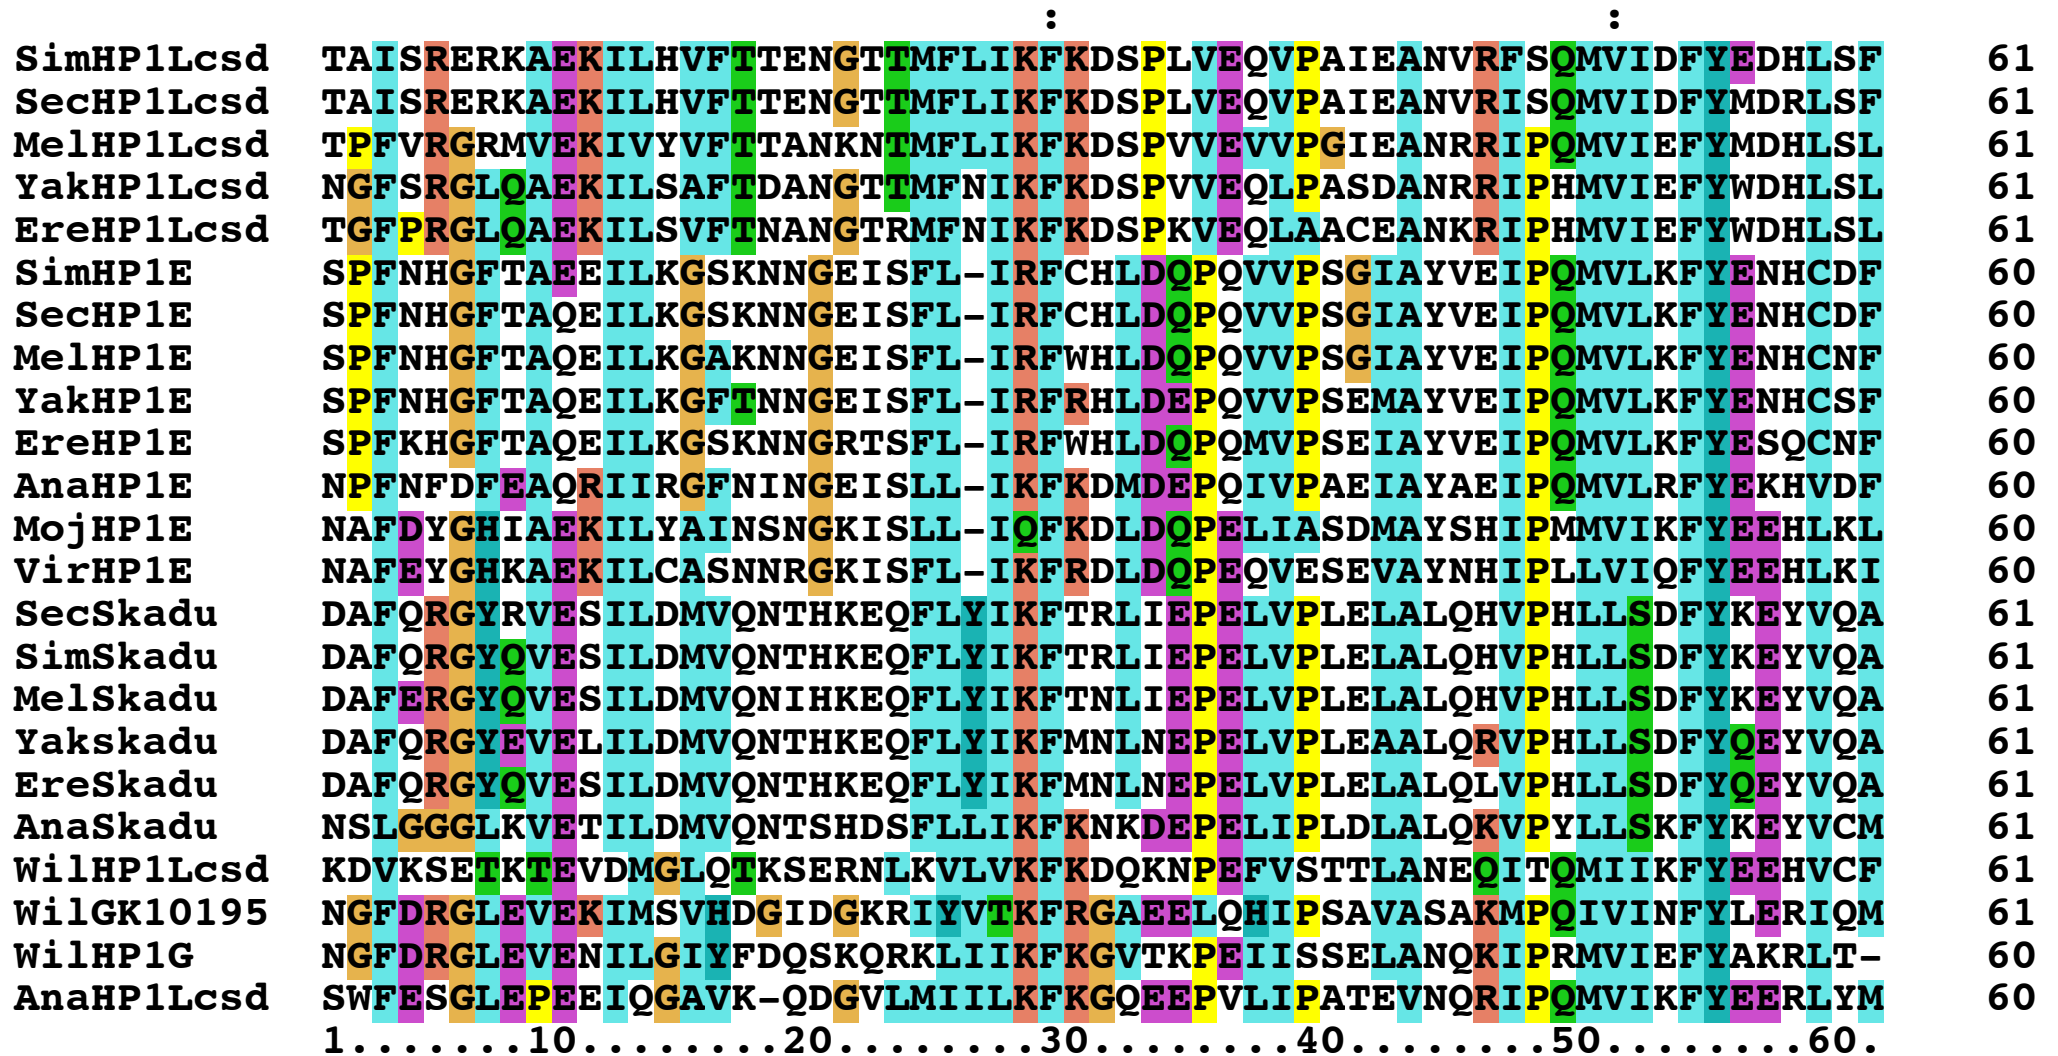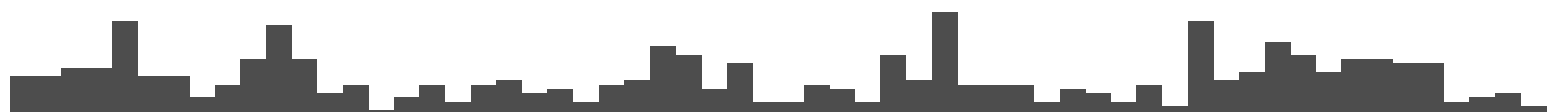

Supplement: pgen.1002729.s006.pdf [file pgen.1002729.s006.pdf]
